# Supplementary material for: Synthesis and characterization of metal-substituted tetraalkylphosphonium polyoxometalate ionic liquids
Source: Royal Society of Chemistry journal article supplement (doi:10.1039/c5nj01093d), 2016-01-01
Supplement: c5nj01093d1.pdf [file c5nj01093d1.pdf]

## **SUPPORTING INFORMATION MATERIAL**

### **Synthesis of Metal-Substituted Tetraalkylphosphonium Polyoxometalate Ionic Liquids**

Filipe M. Santos, Sandra P. Magina, Helena I. S. Nogueira and Ana M. V. Cavaleiro

Departament of Chemistry/CICECO, University of Aveiro, 3810-193 Aveiro, Portugal

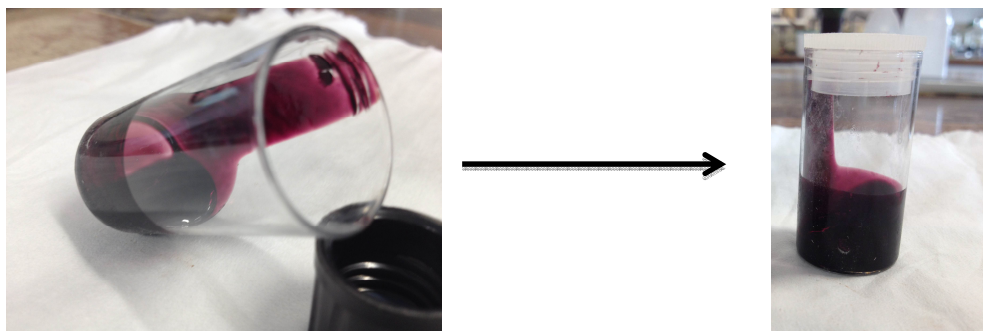

Fig. S1. – Picture of  $(\text{THTP})_4[(\text{PW}_{11}\text{O}_{39}\text{Mn}^{\text{III}}(\text{H}_2\text{O}))]$  3 after heated with the flask tilted and then with the flask back again in a vertical position.

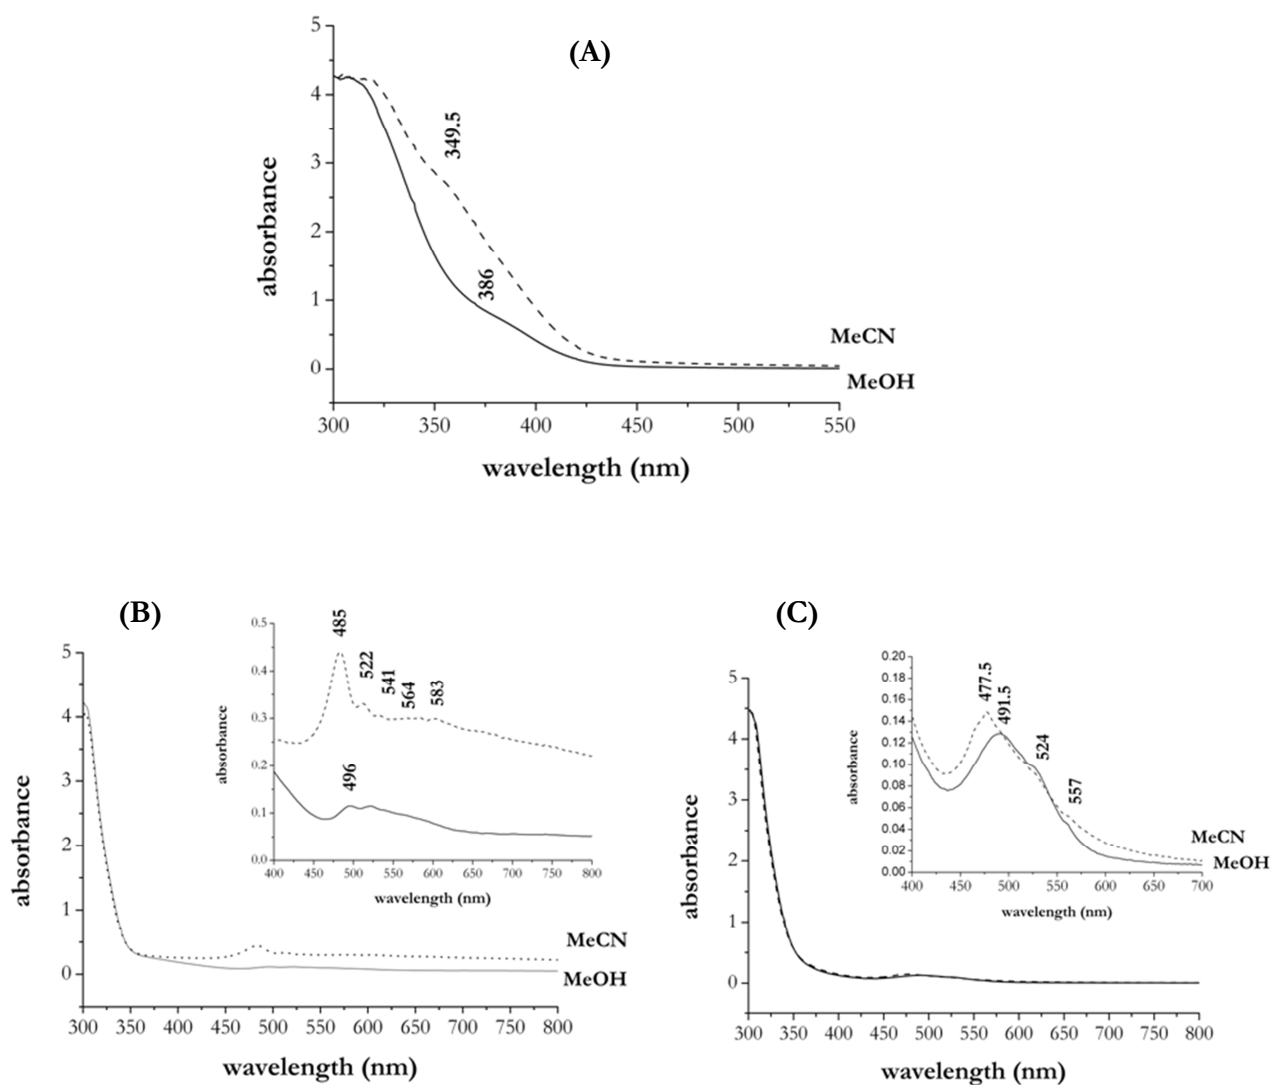

Fig. S2. – UV-vis spectra of (A)  $(\text{THTP})_4[\text{PW}_{11}\text{O}_{39}\text{Fe}^{\text{III}}(\text{H}_2\text{O})]$  1; (B)  $(\text{THTP})_5[(\text{PW}_{11}\text{O}_{39}\text{Co}^{\text{II}}(\text{H}_2\text{O}))]$  2; (C)  $(\text{THTP})_4[(\text{PW}_{11}\text{O}_{39}\text{Mn}^{\text{III}}(\text{H}_2\text{O}))]$  3 in methanol and acetonitrile, respectively ( $C = 1.0 \times 10^{-3}\text{M}$ ).

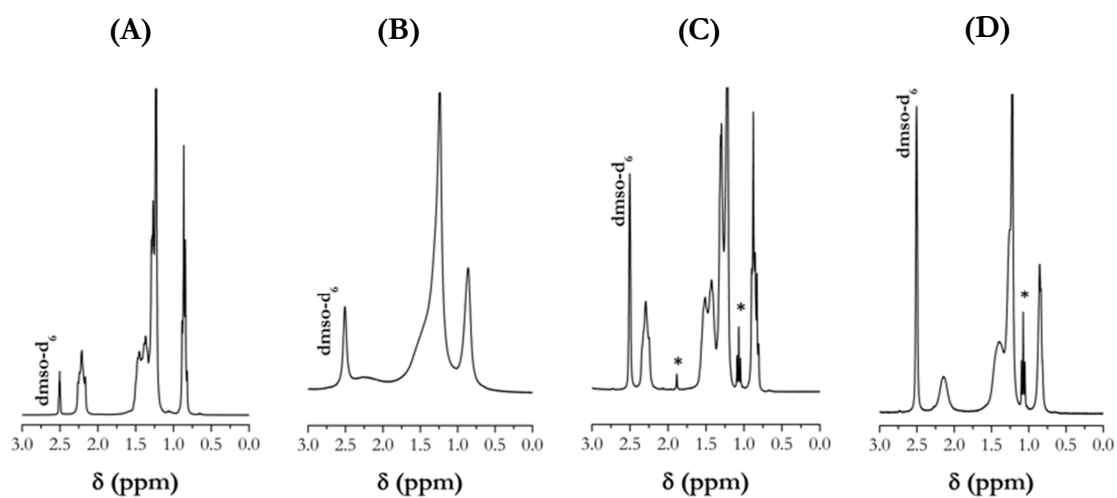

Fig. S3. –  $^1\text{H}$  NMR spectra, in  $\text{dmsO-d}_6$ , of (A)  $\text{THTPBr}$ , (B)  $(\text{THTP})_4[(\text{PW}_{11}\text{O}_{39}\text{Fe}^{\text{III}}(\text{H}_2\text{O}))]$  1, (C)  $(\text{THTP})_5[(\text{PW}_{11}\text{O}_{39}\text{Co}^{\text{II}}(\text{H}_2\text{O}))]$  2 and (D)  $(\text{THTP})_4[(\text{PW}_{11}\text{O}_{39}\text{Mn}^{\text{III}}(\text{H}_2\text{O}))]$  3. (\*) indicates an impurity found on the tube.

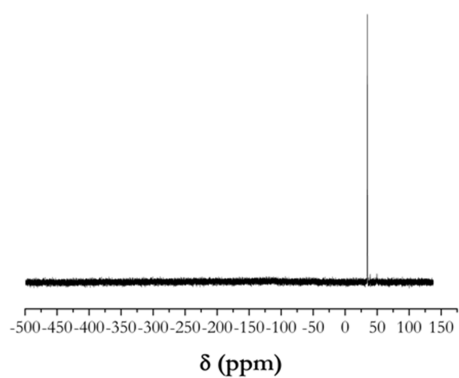

Fig. S4. –  $^{31}\text{P}$  NMR spectrum of  $(\text{THTP})_5[(\text{PW}_{11}\text{O}_{39}\text{Co}^{\text{II}}(\text{H}_2\text{O}))]$  2 in  $\text{dmsO-d}_6$ .

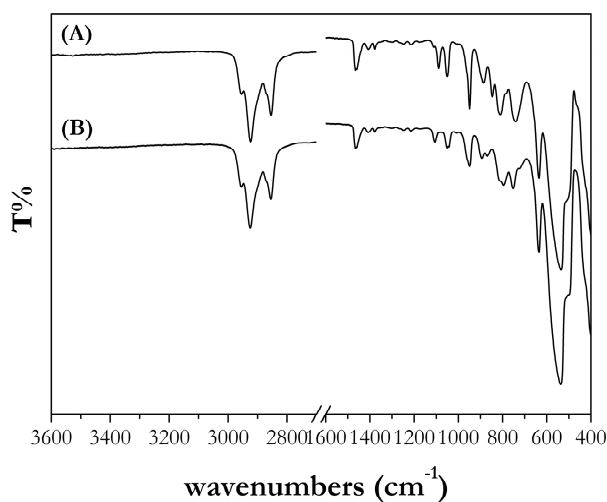

Fig. S5. – FTIR-ATR spectra of (A)  $(\text{THTP})_7[\text{PW}_{11}\text{O}_{39}]$  (4) and (B)  $(\text{THTP})_{10}[\text{P}_2\text{W}_{20}\text{O}_{70}]$  (5).

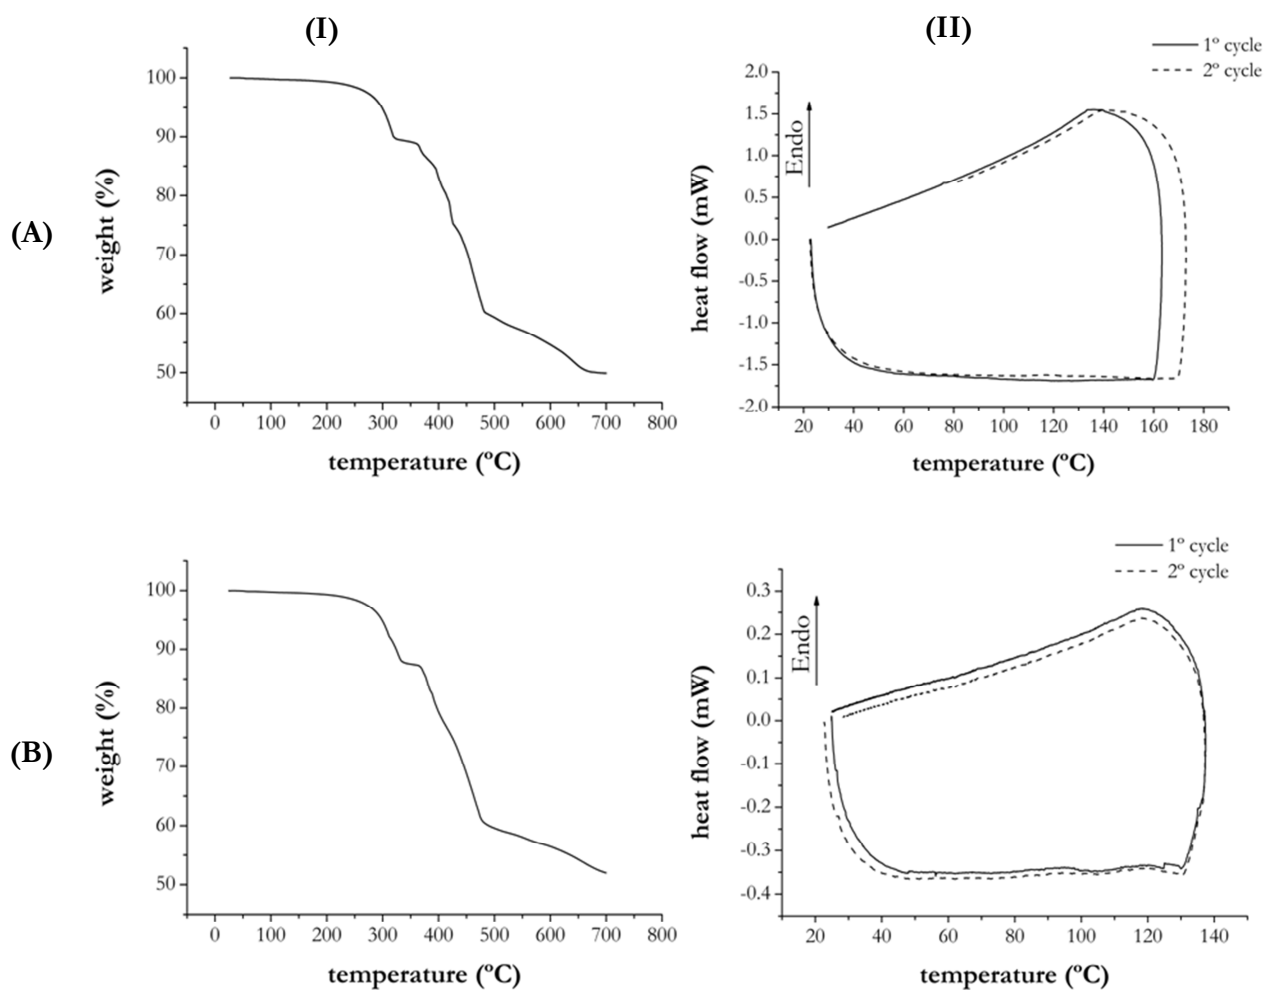

Fig. S6. – Thermal analyses performed on (A)  $(\text{THTP})_5[\text{PW}_{11}\text{O}_{39}\text{Co}^{\text{II}}(\text{H}_2\text{O})]$  2 and (B)  $(\text{THTP})_4[\text{PW}_{11}\text{O}_{39}\text{Mn}^{\text{III}}(\text{H}_2\text{O})]$  3. In I, the thermogravimetric curves are presented and in II, the DSC curves.

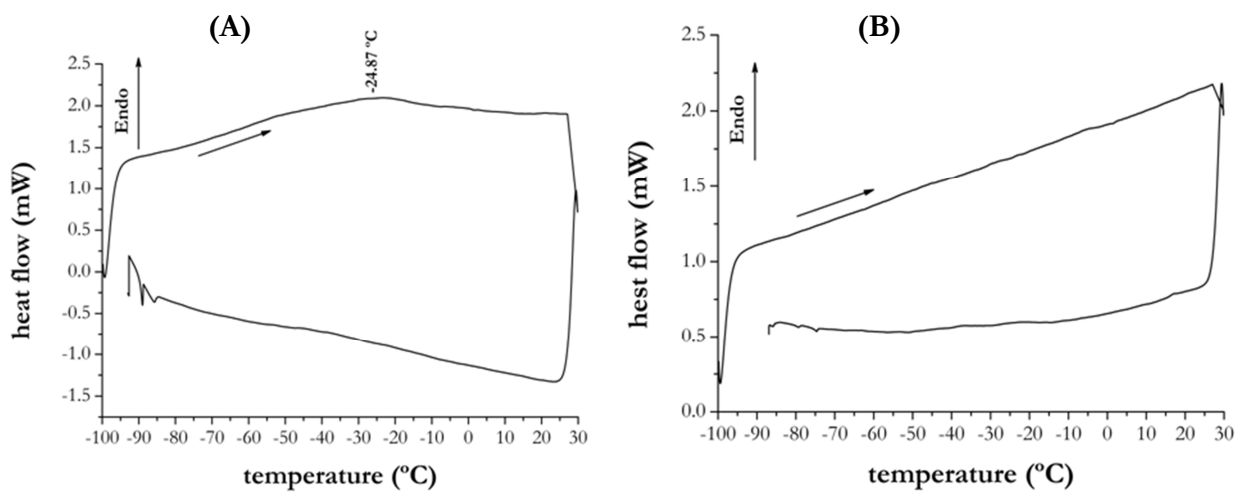

Fig. S7. – DSC plots for (A)  $(\text{THTP})_5[\text{PW}_{11}\text{O}_{39}\text{Co}^{\text{II}}(\text{H}_2\text{O})]$  2; (B)  $(\text{THTP})_4[\text{PW}_{11}\text{O}_{39}\text{Mn}^{\text{III}}(\text{H}_2\text{O})]$  3, between  $-100$   $^{\circ}\text{C}$  and  $+30$   $^{\circ}\text{C}$ . Heating rate:  $-10$   $^{\circ}\text{C} \cdot \text{min}^{-1}$ .

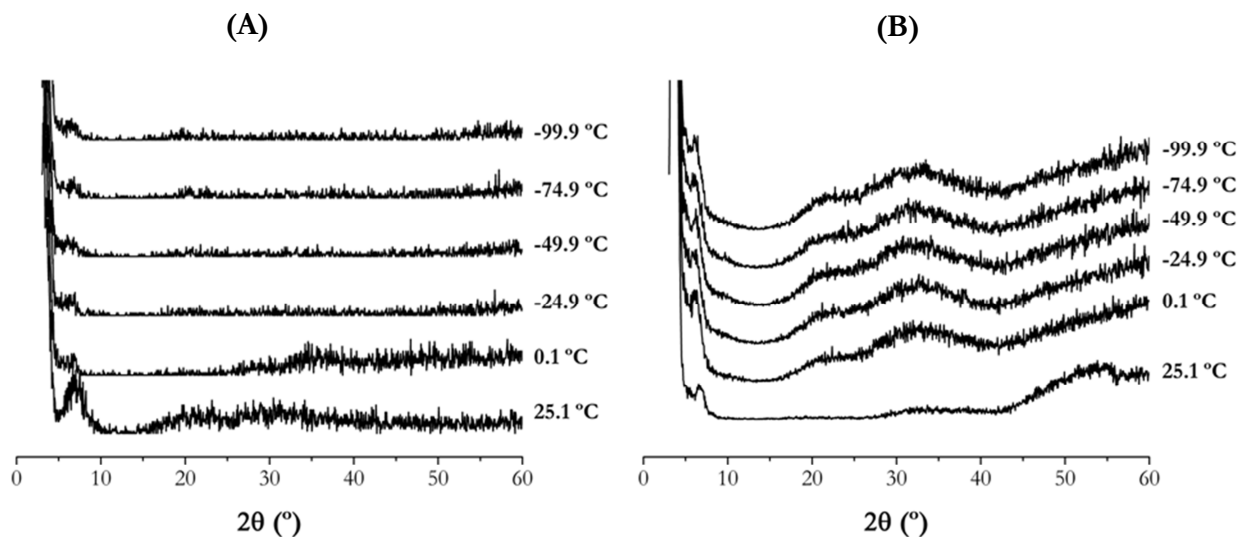

Fig. S8. – X-ray patterns for (A)  $(\text{THTP})_4[\text{PW}_{11}\text{O}_{39}\text{Fe}^{\text{III}}(\text{H}_2\text{O})]$  1; (B)  $(\text{THTP})_5[(\text{PW}_{11}\text{O}_{39}\text{Co}^{\text{II}}(\text{H}_2\text{O}))]$  2, between -100 °C and +25 °C. Heating rate:  $-5\text{ }^{\circ}\text{C}\cdot\text{min}^{-1}$ .

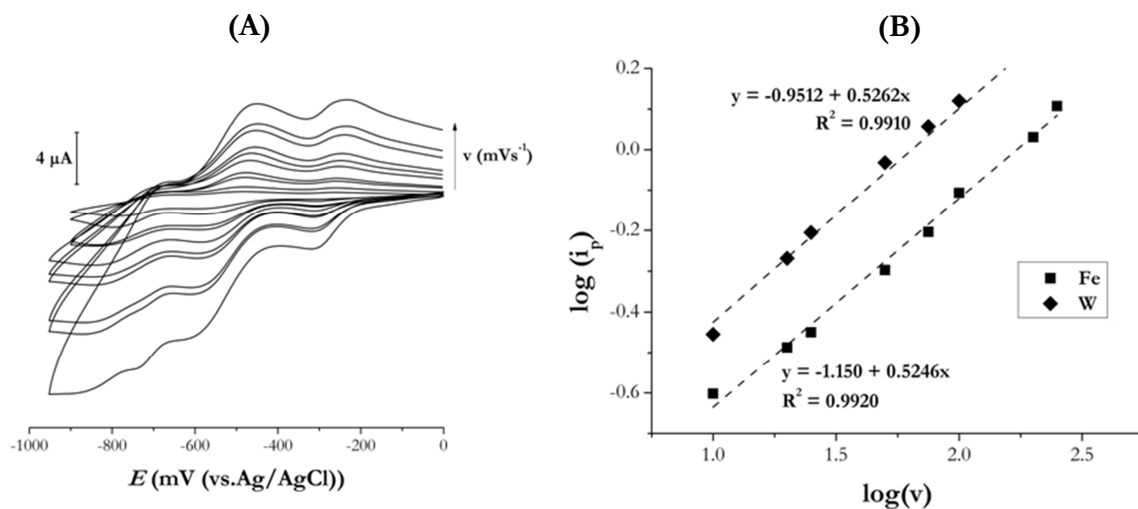

Fig. S9. – Variation of the electrochemical signal of (1) for a pH 2.0 solution. (A) cyclic voltammograms for  $v = 5, 10, 20, 25, 50, 75, 100, 200, 250$  and  $500\text{ mV s}^{-1}$ ; (B) slopes of  $(i_p) = f(\log v)$  for the  $\text{Fe}^{\text{III}}/\text{Fe}^{\text{II}}$  and the first  $\text{W}^{\text{VI}}/\text{W}^{\text{V}}$  redox pairs for scanning rates between 10 and  $100\text{ mV s}^{-1}$ .
